# Supplementary material for: The Possible Role of Anti- and Protumor-Infiltrating Lymphocytes in Pathologic Complete Response in Early Breast Cancer Patients Treated with Neoadjuvant Systemic Therapy
Source: MDPI journal article supplement (doi:10.3390/cancers15194794), 2023-09-29
Supplement: s1 [file s1]

## Supplementary Materials

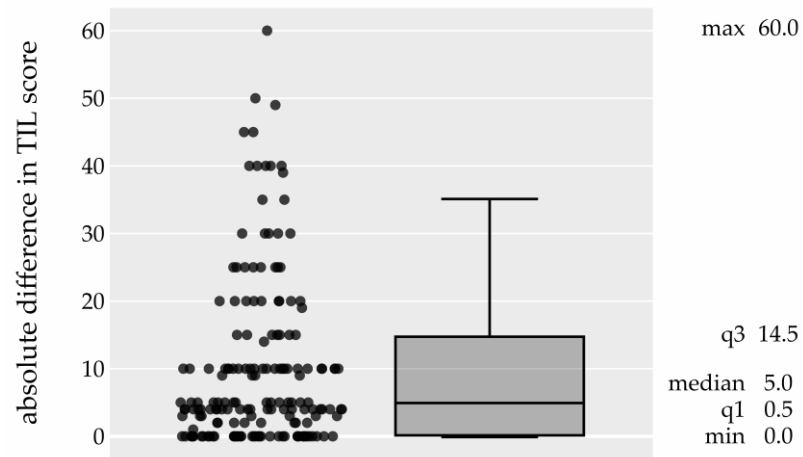

**Figure S1:** Absolute difference between TIL scores of two pathologists, boxplot.

Abbreviations: min: minimum; max: maximum; q3: 3<sup>rd</sup> quartile; q1: 1<sup>st</sup> quartile; TIL: tumor-infiltrating lymphocytes.

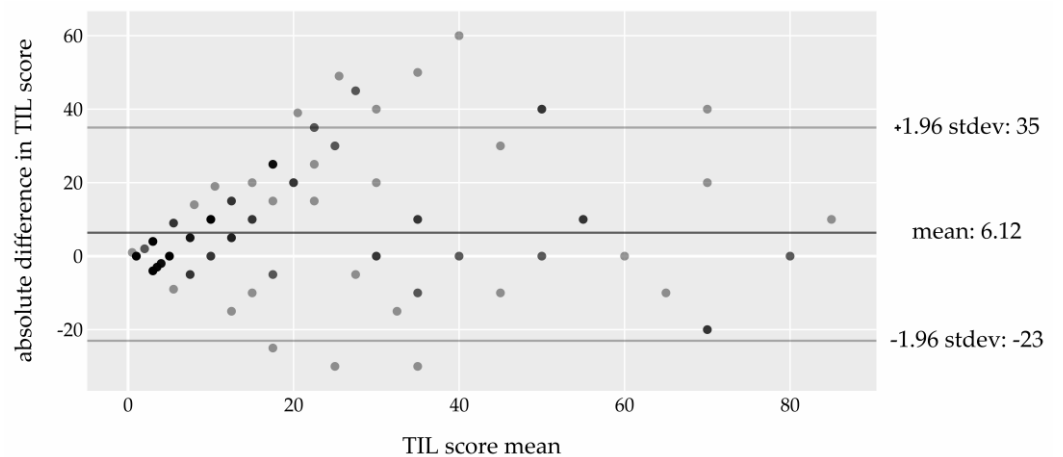

**Figure S2:** Bland-Altman plot for TIL measurements by two pathologists (solid line represents the mean difference, the dashed lines represent the 95% limits of agreement).

Abbreviations: TIL: tumor-infiltrating lymphocytes; stdev: standard deviation.

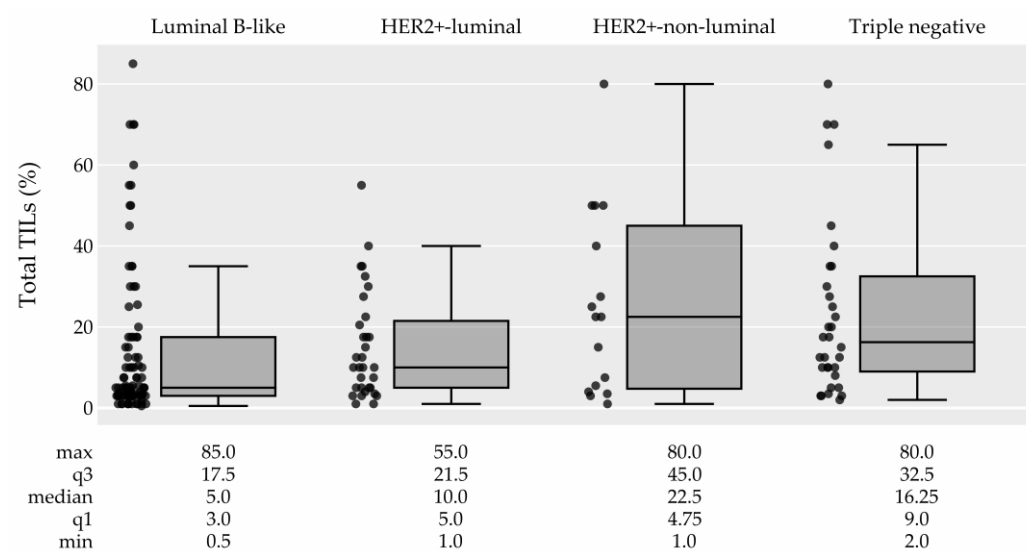

**Figure S3:** Distribution of tumor-infiltrating lymphocytes in breast cancer according to the four breast cancer subtypes, boxplots. The difference in TIL between breast cancer subtypes on our sample ( $p=0.004$ ) could not be generalized to the population (adjusted  $p=0.085$ ), see Table S1. Abbreviations: min: minimum; max: maximum; q3: 3<sup>rd</sup> quartile; q1: 1<sup>st</sup> quartile; TIL: tumor-infiltrating lymphocytes; HER-2: human epidermal growth factor receptor 2.

**Table S1.** Association of TIL and its subtypes (CD8+ TILs, CXCL13+ TILs, PD-1+ TILs, FOXP3+ TILs) with other clinicopathological characteristics. 1

| Clinicopathologic characteristics | total TILs median (IQR) | p*     | ad-justed p-value † | total TILs n(%) low (<60%) high (≥60%) | p #   | ad-justed p-value † | CD8+ TILs median (IQR) | p *   | ad-justed p-value † | CXCL13+ TILs median (IQR) | p *   | ad-justed p-value † | PD-1+ TILs median (IQR) | p *   | ad-justed p-value † | FOXP3+ TILs median (IQR) | p *    | ad-justed p-value † |
|-----------------------------------|-------------------------|--------|---------------------|----------------------------------------|-------|---------------------|------------------------|-------|---------------------|---------------------------|-------|---------------------|-------------------------|-------|---------------------|--------------------------|--------|---------------------|
| <b>Grade 3</b>                    | 12.5 (4.0-30.0)         | <0.001 | <b>0.002</b>        | 115 (93.0%)                            | 0.290 | 1.0                 | 40.0 (30.0-50.0)       | 0.077 | 1.0                 | 1.0 (0.0-2.0)             | 0.302 | 1.0                 | 2.0 (0.0-7.0)           | 0.001 | <b>0.015</b>        | 5.0 (2.0-7.5)            | <0.001 | <b>0.012</b>        |
| <b>Grade 2</b>                    | 5.0 (3.0-7.5)           |        |                     | 45 (98.0%)                             |       |                     | 30.0 (20.0-50.0)       |       |                     | 1.0 (1.0-1.0)             |       |                     | 0.0 (0.0-2.0)           |       |                     | 2.0 (1.0-5.0)            |        |                     |
| <b>Ki-67 10-20%</b>               | 5.0 (3.0-10.0)          | <0.001 | <b>0.002</b>        | 45 (98.0%)                             | 0.224 | 1.0                 | 40.0 (30.0-50.0)       | 0.420 | 1.0                 | 1.0 (0.5-2.0)             | 0.800 | 1.0                 | 0.0 (0.0-2.0)           | 0.001 | <b>0.024</b>        | 2.5 (1.0-5.0)            | 0.021  | 0.487               |
| <b>Ki-67 20-40%</b>               | 10.0 (3.8-20.0)         |        |                     | 63 (95.0%)                             |       |                     | 40.0 (30.0-50.0)       |       |                     | 1.0 (0.0-2.0)             |       |                     | 1.0 (0.0-5.0)           |       |                     | 4.0 (1.0-8.0)            |        |                     |
| <b>Ki-67 &gt;40%</b>              | 17.5 (5.5-35.0)         |        |                     | 52 (90.0%)                             |       |                     | 40.0 (27.5-50.0)       |       |                     | 1.0 (1.0-2.0)             |       |                     | 3.0 (2.0-8.0)           |       |                     | 5.0 (2.0-7.0)            |        |                     |
| <b>Lymph nodes positive</b>       | 10.0 (3.5-25.0)         | 0.284  | 1.0                 | 117 (94.0%)                            | 1.000 | 1.0                 | 40.0 (30.0-50.0)       | 0.259 | 1.0                 | 1.0 (1.0-2.0)             | 0.546 | 1.0                 | 2.0 (0.0-5.0)           | 0.740 | 1.0                 | 5.0 (1.0-7.0)            | 0.840  | 1.0                 |
| <b>Lymph nodes negative</b>       | 6.5 (3.0-20.0)          |        |                     | 44 (96.0%)                             |       |                     | 40.0 (20.0-50.0)       |       |                     | 1.0 (0.0-2.5)             |       |                     | 1.5 (0.0-6.0)           |       |                     | 3.0 (1.0-7.0)            |        |                     |
| <b>Tumor ≤20 mm (MRI)</b>         | 30.0 (5.0-50.0)         | 0.051  | 1.0                 | 22 (88.0%)                             | 0.305 | 1.0                 | 40.0 (25.0-50.0)       | 0.887 | 1.0                 | 1.0 (1.0-2.0)             | 0.002 | 0.051               | 3.0 (0.0-8.0)           | 0.609 | 1.0                 | 5.0 (1.0-10.0)           | 0.709  | 1.0                 |
| <b>Tumor 20-50 mm (MRI)</b>       | 10.0 (3.0-22.5)         |        |                     | 106 (94.0%)                            |       |                     | 40.0 (30.0-50.0)       |       |                     | 1.0 (0.0-2.0)             |       |                     | 2.0 (0.0-5.0)           |       |                     | 4.0 (1.5-7.0)            |        |                     |
| <b>Tumor &gt;50 mm (MRI)</b>      | 6.5 (4.0-11.2)          |        |                     | 18 (100.0%)                            |       |                     | 40.0 (30.0-50.0)       |       |                     | 2.0 (2.0-5.0)             |       |                     | 1.0 (0.0-7.0)           |       |                     | 5.0 (3.0-7.0)            |        |                     |
| <b>Luminal B-like</b>             | 5.0 (3.0-17.5)          | 0.004  | 0.085               | 86 (95.0%)                             | 0.173 | 1.0                 | 40.0 (30.0-50.0)       | 0.346 | 1.0                 | 1.0 (1.0-2.0)             | 0.499 | 1.0                 | 1.0 (0.0-5.0)           | 0.062 | 1.0                 | 3.0 (1.0-6.5)            | 0.027  | 0.598               |
| <b>HER2+ -luminal</b>             | 10.0 (5.0-21.5)         |        |                     | 32 (100.0%)                            |       |                     | 45.0 (30.0-50.0)       |       |                     | 1.0 (1.0-1.0)             |       |                     | 1.0 (0.0-2.5)           |       |                     | 3.0 (1.0-5.0)            |        |                     |
| <b>HER2+ -non-luminal</b>         | 22.5 (4.8-45.0)         |        |                     | 15 (94.0%)                             |       |                     | 40.0 (30.0-60.0)       |       |                     | 2.0 (0.0-3.0)             |       |                     | 2.5 (0.0-8.5)           |       |                     | 6.0 (3.5-9.0)            |        |                     |
| <b>Triple negative</b>            | 16.2 (9.0-32.5)         |        |                     | 28 (88.0%)                             |       |                     | 40.0 (30.0-40.0)       |       |                     | 1.0 (0.5-2.0)             |       |                     | 3.0 (2.0-8.0)           |       |                     | 6.0 (3.0-7.5)            |        |                     |

\*Mann-Whitney test (if 2 categories) or Kruskal-Wallis test (if 3 categories or more); # Fisher's exact test; † p-values were adjusted for all comparisons in this table. Statistically significant adjusted p-values are presented in bold.

Abbreviations: TIL: tumor-infiltrating lymphocytes; HER-2: human epidermal growth factor receptor 2; IQR: interquartile range; n: number

**Table S2:** Multivariable logistic model of prognostic factors for pathological complete response (AUC= 0.807, loglikelihood ratio test p<0.001).

| Characteristic                                      | OR (95% CI)       | p-value          |
|-----------------------------------------------------|-------------------|------------------|
| <b>CD8+ TILs (per 10%)</b>                          | 1.31 (1.01-1.72)  | <b>0.045</b>     |
| <b>Age</b>                                          | 0.98 (0.95-1.02)  | 0.351            |
| <b>Ki-67 (per 10%)</b>                              | 1.44 (1.18-1.79)  | <b>&lt;0.001</b> |
| <b>Negative lymph nodes</b>                         | 2.34 (1.03-5.42)  | <b>0.042</b>     |
| <b>HER2+-luminal, HER2+-non-luminal, TN vs lumB</b> | 4.93 (2.31-11.09) | <b>&lt;0.001</b> |

Statistically significant p-values are presented in bold.

TIL: tumor-infiltrating lymphocytes; TN: triple negative subtype; lumB: luminal B subtype; HER-2: human epidermal growth factor receptor 2; OR: odds ratio; CI: confidence interval; AUC: area under the curve

**Table S3:** Multivariable logistic model of prognostic factors for pathological complete response (AUC= 0.796, loglikelihood ratio test p<0.001).

| Characteristic                                      | OR (95% CI)       | p-value          |
|-----------------------------------------------------|-------------------|------------------|
| <b>CXCL13+ TILs (per 10%)</b>                       | 1.01 (0.18-5.35)  | 0.934            |
| <b>Age</b>                                          | 0.98 (0.95-1.01)  | 0.235            |
| <b>Ki-67 (per 10%)</b>                              | 1.39 (1.14-1.71)  | <b>0.001</b>     |
| <b>Negative lymph nodes</b>                         | 1.93 (0.85-4.39)  | 0.114            |
| <b>HER2+-luminal, HER2+-non-luminal, TN vs lumB</b> | 4.79 (2.26-10.66) | <b>&lt;0.001</b> |

Statistically significant p-values are presented in bold.

TIL: tumor-infiltrating lymphocytes; TN: triple negative subtype; lumB: luminal B subtype; HER-2: human epidermal growth factor receptor 2; OR: odds ratio; CI: confidence interval; AUC: area under the curve

**Table S4:** Multivariable logistic model of prognostic factors for pathological complete response (AUC= 0.801, loglikelihood ratio test p<0.001).

| Characteristic                                      | OR (95% CI)       | p-value          |
|-----------------------------------------------------|-------------------|------------------|
| <b>PD-1+ TILs (per 10%)</b>                         | 1.56 (0.87-2.83)  | 0.131            |
| <b>Age</b>                                          | 0.98 (0.95-1.01)  | 0.262            |
| <b>Ki-67 (per 10%)</b>                              | 1.37 (1.12-1.69)  | <b>0.002</b>     |
| <b>Negative lymph nodes</b>                         | 2.20 (0.97-5.08)  | 0.059            |
| <b>HER2+-luminal, HER2+-non-luminal, TN vs lumB</b> | 4.79 (2.26-10.67) | <b>&lt;0.001</b> |

Statistically significant p-values are presented in bold.

TIL: tumor-infiltrating lymphocytes; TN: triple negative subtype; lumB: luminal B subtype; HER-2: human epidermal growth factor receptor 2; OR: odds ratio; CI: confidence interval; AUC: area under the curve

**Table S5:** Multivariable logistic model of prognostic factors for pathological complete response (AUC= 0.807, loglikelihood ratio test p<0.001).

| Characteristic                               | OR (95% CI)       | p-value          |
|----------------------------------------------|-------------------|------------------|
| FOXP3+ TILs (per 10%)                        | 1.83 (0.73-4.61)  | 0.193            |
| Age                                          | 0.98 (0.95-1.01)  | 0.213            |
| Ki-67 (per 10%)                              | 1.38 (1.13-1.70)  | <b>0.001</b>     |
| Negative lymph nodes                         | 2.08 (0.92-4.72)  | 0.076            |
| HER2+-luminal, HER2+-non-luminal, TN vs lumB | 4.65 (2.21-10.27) | <b>&lt;0.001</b> |

Statistically significant p-values are presented in bold.

TIL: tumor-infiltrating lymphocytes; TN: triple negative subtype; lumB: luminal B subtype; HER-2: human epidermal growth factor receptor 2; OR: odds ratio; CI: confidence interval; AUC: area under the curve

**Table S6:** Multivariable logistic model of prognostic factors for pathological complete response (AUC= 0.811, loglikelihood ratio test p<0.001).

| Characteristic                               | OR (95% CI)       | P-value          |
|----------------------------------------------|-------------------|------------------|
| CD8+ TILs (per 10%)                          | 1.29 (0.96-1.76)  | 0.086            |
| CXCL13+ TILs (per 10%)                       | 0.55 (0.07-3.68)  | 0.533            |
| PD-1+ TILs (per 10%)                         | 1.31 (0.66-2.66)  | 0.429            |
| FOXP3+ TILs (per 10%)                        | 1.21 (0.39-3.63)  | 0.708            |
| Age                                          | 0.98 (0.95-1.02)  | 0.328            |
| Ki-67 (per 10%)                              | 1.37 (1.12-1.71)  | <b>0.002</b>     |
| Negative lymph nodes                         | 2.04 (0.88-4.78)  | 0.096            |
| HER2+-luminal, HER2+-non-luminal, TN vs lumB | 5.19 (2.40-11.92) | <b>&lt;0.001</b> |

Statistically significant p-values are presented in bold.

TIL: tumor-infiltrating lymphocytes; TN: triple negative subtype; lumB: luminal B subtype; HER-2: human epidermal growth factor receptor 2; OR: odds ratio; CI: confidence interval; AUC: area under the curve
